# Supplementary material for: Phenotypic Characterization of a Diverse Population of <em>Cannabis sativa</em> for Agronomic, Morphological, and Biochemical Traits
Source: Preprints.org preprint supplement (doi:10.20944/preprints202309.1295.v1), 2023-09-20
Supplement: Supplementary file 1 [file supplementary_tables_Lapierre_et_al.xlsx]

## Sheet: Table 1
Chemical pretreatments		Concentration	Time
Distilled water		-	18h
(W-18)
(W-24)			24h
Peroxide		1% v/v	24h
(HP-1)
(HP-3)		3% v/v
Gibberellic acid		500 mg/L	24h
(GA-500)
(GA-800)		800 mg/L
Sodium hypochlorite		1% v/v	2h
(NACL-2)
NACL-24)			24h
Potassium nitrate		1.5 % w/v	24h
(KN-1.5)
(KN-3)		3% w/v
Physical treatments
Knife scarification + Distilled water		-	24h
(K+W)
Sandpaper scarification + Distilled water(S+W)		-	24h

## Sheet: Table 2
Plant ID	Name	Source	Sex
AG-3	Los angeles Pure Kush Wilson or Big Miracle x Cherry wine CBD-1	Seed	REG
AJ-1	White wedding-1	Cuttings	FEM
AJ-10	Terple-1	Cuttings	FEM
AJ-11	Terple-2	Cuttings	FEM
AJ-12	Terple-3	Cuttings	FEM
AJ-13	Sour Diesel (Bx4)-1	Cuttings	FEM
AJ-14	Sour Diesel (Bx4)-2	Cuttings	FEM
AJ-15	Sour Diesel (Bx4)-3	Cuttings	FEM
AJ-16	SLH (Super Lemon Haze F5)-1	Cuttings	FEM
AJ-17	SLH (Super Lemon Haze F5)-2	Cuttings	FEM
AJ-19	Putang OG-1	Cuttings	FEM
AJ-2	White wedding-2	Cuttings	FEM
AJ-20	Putang OG-2	Cuttings	FEM
AJ-21	Putang OG-3	Cuttings	FEM
AJ-22	Purple Majik 5-1	Cuttings	FEM
AJ-23	Purple Majik 5-2	Cuttings	FEM
AG-4	Los angeles Pure Kush Wilson or Big Miracle x Cherry wine CBD-2	Seed	REG
AJ-24	Purple Majik 5-3	Cuttings	FEM
AJ-25	Punch Breath 6-1	Cuttings	FEM
AJ-26	Punch Breath 6-2	Cuttings	FEM
AJ-27	Punch Breath 6-3	Cuttings	FEM
AJ-28	Punch Breath 5-1	Cuttings	FEM
AJ-29	Punch Breath 5-2	Cuttings	FEM
AJ-3	White wedding-3	Cuttings	FEM
AJ-30	Punch Breath 5-3	Cuttings	FEM
AJ-31	OBE Breath 1-1	Cuttings	FEM
AJ-32	OBE Breath 1-2	Cuttings	FEM
AJ-33	OBE Breath 1-3	Cuttings	FEM
AJ-34	MC-6361-1	Cuttings	FEM
AJ-35	MC-6361-2	Cuttings	FEM
AJ-36	MC-6361-3	Cuttings	FEM
AJ-37	Hyperion 7-1	Cuttings	FEM
AJ-38	Hyperion 7-2	Cuttings	FEM
AJ-39	Hyperion 7-3	Cuttings	FEM
AJ-4	Wedding cake (CBD1)-1	Cuttings	FEM
AJ-40	HA Bruce Banner 1-1	Cuttings	FEM
AJ-41	HA Bruce Banner 1-2	Cuttings	FEM
AJ-42	HA Bruce Banner 1-3	Cuttings	FEM
AJ-43	Grape Pupil 5-1	Cuttings	FEM
AJ-44	Grape Pupil 5-2	Cuttings	FEM
AJ-45	Grape Pupil 4-1	Cuttings	FEM
AJ-47	Grape Pupil 4-2	Cuttings	FEM
AJ-49	Green Crack CBD5 (GCCBD5)-1	Cuttings	FEM
AJ-5	Wedding cake (CBD1)-2	Cuttings	FEM
AJ-50	Green Crack CBD 5 (GCCBD5)-2	Cuttings	FEM
AJ-51	Green Crack CBD 2 (GCCBD2)-1	Cuttings	FEM
AJ-52	Green Crack CBD 2 (GCCBD2)-2	Cuttings	FEM
AJ-53	Dr.Seedsman-1	Cuttings	FEM
AJ-54	Dr.Seedsman-2	Cuttings	FEM
AJ-55	Dr.Seedsman-3	Cuttings	FEM
AJ-56	Cres 805-1	Cuttings	FEM
AJ-57	Cres 805-2	Cuttings	FEM
AJ-58	Cres 805-3	Cuttings	FEM
AJ-59	Cherry Garcia-1	Cuttings	FEM
AJ-6	Wedding cake (CBD1)-3	Cuttings	FEM
AJ-60	Cherry Garcia-2	Cuttings	FEM
AJ-61	Cherry Garcia-3	Cuttings	FEM
AJ-62	Breath Rays 6-1	Cuttings	FEM
AJ-63	Breath Rays 6-2	Cuttings	FEM
AJ-64	Breath Rays 6-3	Cuttings	FEM
AJ-65	Green Crack CBD5 (GCCBD5)-3	Cuttings	FEM
AJ-7	Trop 2683-1	Cuttings	FEM
AJ-8	Trop 2683-2	Cuttings	FEM
AJ-9	Trop 2683-3	Cuttings	FEM
AN-117	Dream Beaver x Banana	Seed	REG
AN-126	Charlotte's Gift F2	Seed	REG
AN-17	XXX	Seed	FEM
AN-63	SSSDH x Whitelotus	Seed	REG
AN-129	Red Headed Stranger x Skunk	Seed	REG
AN-40	Pupilstan	Seed	FEM
AN-93	Mystery Stash	Seed	REG
AN-103	Skunk VA x Tiger's Milk #3	Seed	REG
AN-91	Blue Skies #22 F2	Seed	REG
AN-141	Mountain Temple F2 (Great ?)	Seed	REG
AN-33	Super Lemon Pupil	Seed	FEM
AN-86	Charlotte's Web x (Death ?)	Seed	REG
AN-102	Tiger Chem x Chemdog Mix	Seed	REG
AN-15	End Game R2	Seed	FEM
AN-116	Tiger's Milk #2 x Whitelotus	Seed	REG
AN-121	Twisted Lime x Garlic Chem	Seed	REG
AN-83	Blue Skies #4 x Chem ISP	Seed	REG
AN-66	Twisted Grapes F2	Seed	REG
AN-59	Platinum Banana OG x Dream	Seed	REG
AN-55	Tropical Bamboo	Seed	REG
AN-71	Sweet Skunk x Oracle Snow	Seed	REG
AN-53	Beaver Milk	Seed	REG
AN-127	SSDD x Oracle Snow*	Seed	REG
AN-10	CBD Blue Shark	Seed	FEM
AN-51	Alien Stardawg x Tiger's Milk	Seed	REG
AN-45	Mountain Temple #3 x Wookie	Seed	REG
AN-11	Early Lemon Berry R1	Seed	FEM
AN-131	Midnight Snow BX1	Seed	REG
AN-7	Grape Pupil V2	Seed	FEM
AN-74	Alien OG x Bubba Stardawg	Seed	REG
AN-14	Mandarin Zkittlez R1	Seed	FEM
AN-111	Chiquita Banana x Garlic Chem	Seed	REG
AN-107	Garlic Chem S1	Seed	REG
AN-30	Pak Man	Seed	FEM
AN-21	Critical Mass CBD	Seed	FEM
AN-140	VA x Twisted Grapes	Seed	REG
AN-27	Trop Cherry Gas	Seed	FEM
AN-105	SFV x Platinum OG x Dream	Seed	REG
AN-41	Platinium Swabi Punch	Seed	FEM
AN-19	CBD Shark Shock	Seed	FEM
AN-75	Manic Skunk	Seed	REG
AN-110	88G13HP x Garlic Chem	Seed	REG
AN-26	Cherry Cookies BX1 x Dosidos	Seed	FEM
AN-44	Funky Cherries	Seed	REG
AN-31	Platinium Putang Punch	Seed	FEM
AN-5	Crescendo Rbx1	Seed	FEM
AN-24	Speechless	Seed	FEM
AN-37	White Truffle Pupil	Seed	FEM
AN-67	Legendary Larry x Garlic Chem	Seed	REG
AO-90	Passion 1	Seed	FEM
AO-31	M.Kush	Seed	FEM
AO-62	A.Amnesia	Seed	FEM
AO-14	Kosher Haze	Seed	FEM
AO-143	Dirty Cherries	Seed	REG
AO-47	Mazar	Seed	FEM
AO-220	Panama Pupil V4	Seed	REG
AO-214	Valedictorian	Seed	REG
AO-38	Think Fast	Seed	FEM
AO-115	AJ Sour Diesel BX1 #3 x ?	Seed	REG
AO-1	Skunk 1	Seed	FEM
AO-17	C-vibez	Seed	FEM
AO-153	Chem Stallion	Seed	REG
AO-93	C.O. Punch	Seed	FEM
AO-56	Meringue	Seed	FEM
AO-173	Papaya God X Kandahar	Seed	REG
AO-191	UltraWilson	Seed	REG
AO-140	Goji OG #3 (F2)	Seed	REG
AO-182	Selva	Seed	REG
AO-146	Cherry Pine	Seed	REG
AO-25	C.Orange	Seed	FEM
AO-198	JMO x Monkey Berries	Seed	REG
AO-160	AOG1 x Tiger's Milk #3	Seed	REG
AO-227	CBD Divine	Seed	REG
AO-188	Los angeles Pure Kush Wilson Or Big Miracle x Cherry wine CBD-3	Seed	REG
AO-211	Deadly Kernel	Seed	REG
AO-71	B.A Mazar	Seed	FEM
AO-10	Frisian Duck	Seed	FEM
AO-209	Willgnauge	Seed	REG
AO-58	The Ultimate	Seed	FEM
AO-74	A.D. Lime	Seed	FEM
AO-111	Black Water x Underdog x ?	Seed	REG
AO-205	JI Wuntz	Seed	REG
AO-201	Giesel Power	Seed	REG
AO-192	Kush Mints Wilson Bx	Seed	REG
AO-229	JoshD x Wilson F2	Seed	REG
AO-80	Glueberry O. G.	Seed	FEM
AO-196	La Rosca	Seed	REG
AO-101	F. Dew	Seed	FEM
AO-168	Purple Galaxy F3	Seed	REG
AO-102	Cherry Glue	Seed	REG
AO-176	Wilson Berry	Seed	REG
AO-225	CBD Sweet and Sour Widow	Seed	REG
AO-75	B.Blaze	Seed	FEM
AO-166	Cheerios F2	Seed	REG
AO-118	Alien OG x Bubba Stardawg	Seed	REG
AO-157	Elmer Glue x Skunk	Seed	REG
AO-43	S.B Punch	Seed	FEM
AO-125	Gorilla Glue #4 x Garlic Chem	Seed	REG
AO-24	P.Fruit	Seed	FEM
AO-84	S.Cough	Seed	FEM
AO-30	Pamir Gold	Seed	FEM
AO-5	P.Plant	Seed	FEM
AO-52	M. Tulip	Seed	FEM
AO-217	Swabi Child	Seed	REG
AO-34	CBG Force	Seed	FEM
AO-178	Spank Master	Seed	REG
AO-49	HiFi 4G	Seed	FEM
AO-56	Meringue	Seed	FEM
AO-83	White Widow	Seed	FEM
AO-87	B.I. Kush	Seed	FEM
AO-8	Snow Bud	Seed	FEM
AO-98	Auto Blueberry	Seed	FEM

## Sheet: Table 3
	Sowing/Cuttings	V1	V2	V3	V4	V5	V6	V7	F1	F2	F3	F4	F5	F6	F7	F8 -Harvest	F9 -Harvest	F10 -Harvest
Photoperiod	18	18	18	18	18	18	18	18	12	12	12	12	12	12	12	12	12	12
Light intensity (umol/s/m2)	150-200	350-500	350-500	350-500	350-500	350-500	350-500	350-500	800-1200	800-1200	800-1200	800-1200	800-1200	800-1200	800-1200	800-1200	800-1200	800-1200
Day temperature (ºC)	25	28	27	27	27	27	27	27	27	27	27	26	26	25	24	23	22	22
Night temperature (ºC)	23	26	25	25	25	25	25	25	25	25	23	22	21	20	19	18	18	18
DIF (Temperature difference between day and night)	2	2	2	2	2	2	2	2	2	2	4	4	5	5	5	5	4	4
Daytime relative humidity (%)	72	70	70	68	68	68	68	66	63	60	58	58	58	56	55	53	50	50
Nighttime relative humidity (%)	70	68	68	66	66	66	66	54	51	50	44	44	40	36	42	40	40	40
Daytime VPD (Vapor Pressure Deficit) (kPa)	0.8	1.1	1.1	1.1	1.1	1.1	1.1	1.2	1.3	1.4	1.5	1.5	1.5	1.5	1,5 - 1,2	1,5 - 1,2	1,5 - 1,1	1,5 - 1,1

## Sheet: Table 4
(ppm)	Sowing/Cuttings	V1	V2	V3	V4	V5	V6	V7	F1	F2	F3	F4	F5	F6	F7	F8 -Harvest	F9 -Harvest	F10 -Harvest
NO3	0	105	161	220	220	220	220	220	215	215	215	215	215	215	99	0	0	0
NH4	0	12	13	21	21	21	21	21	9	9	9	9	9	9	3	0	0	0
N Total	0	117	174	241	241	241	241	241	224	224	224	224	224	224	102	0	0	0
P	0	28	32	50	50	50	50	50	23	23	23	23	23	23	7	0	0	0
K	0	110	165	227	227	227	227	227	265	265	265	265	265	265	300	0	0	0
Ca	0	46	75	100	100	100	100	100	108	108	108	108	108	108	51	0	0	0
Mg	0	23	37	50	50	50	50	50	54	54	54	54	54	54	25	0	0	0
S	0	0	0	0	0	0	0	0	21	21	21	21	21	21	86	0	0	0
Fe	0	4.93	4.41	4.94	4.94	4.94	4.94	4.94	4.85	4.85	4.85	4.85	4.85	4.85	4.85	0	0	0
Mn	0	1.61	1.56	1.83	1.83	1.83	1.83	1.83	1.78	1.78	1.78	1.78	1.78	1.78	1.57	0	0	0
B	0	0.93	0.84	0.94	0.94	0.94	0.94	0.94	0.93	0.93	0.93	0.93	0.93	0.93	0.91	0	0	0
Zn	0	0.69	0.88	1.14	1.14	1.14	1.14	1.14	1.1	1.1	1.1	1.1	1.1	1.1	0.65	0	0	0
Cu	0	0.52	0.75	1.01	1.01	1.01	1.01	1.01	0.97	0.97	0.97	0.97	0.97	0.97	0.48	0	0	0
Mo	0	0.15	0.21	0.28	0.28	0.28	0.28	0.28	0.3	0.3	0.3	0.3	0.3	0.3	0.16	0	0	0
ECmS/cm	0	0.8	1.22	1.67	1.67	1.67	1.67	1.67	1.74	1.74	1.74	1.74	1.74	1.74	1.26	1	1	1
EC PPM	0	561	854	1171	1045	1045	1045	1045	1217	1217	1217	1217	1217	1217	880	700	700	700

## Sheet: Table 5
	THCA		Δ9-THC		CBDA		CBD		CBGA		CBG		CBC		Potential THC		Potential CBD
Sample	M*	SD**	M	SD	M	SD	M	SD	M	SD	M	SD	M	SD	M	SD	M	SD
AO-38	21.35	0.06	0.16	0.09	0.05	0.03	ND	ND	0.41	0.03	0.07	0.04	0.02	0.14	18.89	0.06	0.04	0.03
AO-166	14.04	0.05	0.17	0.03	0.03	0.01	ND	ND	0.35	0.02	0.04	0.02	0.01	0.02	12.48	0.05	0.03	0.01
AO-209	22.05	0.01	0.17	0.06	0.06	0.02	ND	ND	0.57	0.01	0.08	0.03	0.02	0.24	19.51	0.01	0.05	0.02
AJ-65	5.38	0.04	0.17	0.04	7.49	0.04	0.11	0.02	0.55	0.03	0.04	0.03	0.11	0.02	4.88	0.04	6.68	0.04
AJ-56	23.91	0.02	0.35	0.03	0.06	0.07	ND	ND	0.86	0.02	0.06	0.02	0.06	0.01	21.31	0.02	0.05	0.07
AN-343	0.98	0.07	0.02	0.15	20.40	0.00	0.19	0.03	0.81	0.06	0.07	0.04	0.32	0.02	0.88	0.06	18.08	0.00
AN-267	29.08	0.03	0.16	0.05	0.06	0.01	ND	ND	0.81	0.02	0.07	0.01	0.02	0.04	25.67	0.03	0.05	0.01
AN-211	24.90	0.04	0.15	0.05	0.07	0.04	ND	ND	0.56	0.03	0.08	0.04	0.05	0.14	21.98	0.04	0.06	0.04
Mean		0.04		0.06		0.03		0.03		0.03		0.03		0.08		0.04		0.03
*M: mean (% p/p); **SD: standard deviation (%)

## Sheet: Table 6
#	Méthode	Germination rate day 1			Germination rate day 2			Germination rate day 3			GR
		A	B	C	A	B	C	A	B	C
AE-1	Soak in water - 18 hours	0.5	0.8	0.5	0.7	0.9	0.7	0.7	0.9	0.7	0.7667
AE-2	Soak in water - 24 hours	0.4	0.2	0.8	0.4	0.2	0.8	0.5	0.4	0.8	0.5667
AE-3	1% hydrogen peroxide	0.9	0.75	0.4	0.9	0.75	0.6	0.9	0.7	0.75	0.7833
AE-4	3% hydrogen peroxide	0.7	0.5556	0.4	0.9	0.9	0.6	0.7	0.9	0.9	0.8333
AE-5	Gibberellic acid solution 500 mg/L	0.8	0.7	0.2	0.9	0.9	0.6	0.9	0.9	0.7	0.83
AE-6	Gibberellic acid solution 800 mg/L	0.8	0.4	0.5	0.8	0.4	0.8	1	0.4	0.8	0.73
AE-7	Bleach 1% solution - 2 hours	0.4	1	0.7	1	0.7	0.7	0.7	1	0.8	0.8333
AE-8	Bleach 1% 24H	0.1	0.3	0.3	0.1	0.4	0.3	0.5	0.4	0.4	0.4333
AE-10	1.5% potassium nitrate solution	0.5	0.7	0.7	0.9	0.7	0.8	0.6	0.7	0.8	0.7
AE-11	3% potassium nitrate solution	0.5	0.7	0.9	0.8	0.7	0.8	0.8	0.7	1	0.83
AE-12	Knife scarification + soak in water	0.8	0.4	0.5	0.7	0.4	0.7	0.5	0.7	0.7	0.6333
AE-13	Sandpaper scarification + soak in water	0.6	0.6	0.3	0.7	0.4	0.8	0.5	0.9	0.7	0.7
AE-14	Direct sowing in PROMIX BX	0.1	0.2	0.2	0.5	0.8	1	0.7	0.9	1	0.8667

## Sheet: Table 7
										***
						Normal				**
						Non normal				*
						Shapiro Wilk				.
	General statistic					Values		Residues
	mean	median	sd	min	max	W	p-value	W	p-value	Sex	Type
sex	-	-	-	A	B	-	-	-	-	-	-
type	-	-	-	A	B	-	-	-	-	-	-
ab	-	-	-	A	B	0.47	2.2e-16	0.76	1.11e-15		*
cbn	-	-	-	A	B	0.11	2.2e-16	0.23	2.2e-16
thcv	-	-	-	A	B	0.41	2.2e-16	0.47	2.2e-16		*
cbdv	-	-	-	A	B	0.21	2.2e-16	0.38	2.2e-16		.
hf	21.48	20	7.67	8.75	43	0.93	0.146	0.97	0.788
hh	35.72	36	7.44	11	63	0.93	0.0999	0.98	0.87		*
gih	14.36	14	6.86	1	36.5	0.97	0.000847	0.96	4.07e-05		*
sdaw	0.24	0.24	0.03	0.11	0.32	0.96	8.43e-05	0.97	0.000322
sdah	0.32	0.32	0.04	0.14	0.49	0.94	7.05e-07	0.92	3.82e-08
gisd	0.08	0.08	0.03	0	0.24	0.95	5.95e-06	0.93	1.05e-07
cdf	22.28	21	4.5	12	34.8	0.96	3.74e-05	0.99	0.286
cdh	31.55	31	4.47	12	44	0.98	0.00389	0.98	0.0069	.	**
gicd	9.27	9	4.08	0	22	0.99	0.172	0.99	0.468		*
nodeNflo	19.78	20	3.55	11	32	0.97	0.00164	0.97	0.00108		***
nodeNh	30.18	32	5.83	18	44	0.94	4.89e-07	0.94	2.09e-06		***
gin	10.38	10	3.66	0	18	0.97	0.00256	0.96	5.64e-05
giinl	0.23	0.25	0.45	-1.13	1.36	0.99	0.427	0.99	0.394		*
dtsm	42.84	48	14.71	20	68	0.87	4.81e-11	0.89	3.52e-10	**	***
dtf	54.41	55.5	9.36	25	71	0.92	2.78e-08	0.69	2.2e-16	**
dtmp	105.86	107	13.88	70	133	0.92	2.53e-08	0.72	2.2e-16	**
dtmf	62.09	60.5	7.59	38	123	0.81	4.87e-14	0.63	2.2e-16
fb	600.57	607.5	165.49	90	1260	0.98	0.0406	0.97	0.000273
yield	89	84.13	32.46	6.02	177.03	0.99	0.285	0.98	0.0181
thca	20.2	21.29	8.31	0.33	36.97	0.94	2.38e-06	0.94	7.7e-07
d9thc	0.22	0.19	0.1	0.02	0.78	0.91	1.47e-08	0.91	1.44e-08
cbda	1.35	0.06	3.64	0.02	20.42	0.41	2.2e-16	0.5	2.2e-16	***	*
cbd	0.14	0.13	0.05	0.04	0.21	0.96	0.543	0.98	0.974	***
cbga	0.84	0.61	0.98	0.02	11.6	0.46	2.2e-16	0.49	2.2e-16	*
cbg	0.07	0.06	0.04	0.02	0.24	0.91	1.18e-08	0.93	3.46e-07	*
cbc	0.05	0.03	0.05	0.01	0.31	0.64	2.2e-16	0.67	2.2e-16
thcp	17.93	18.92	7.32	0.29	32.62	0.94	1.86e-06	0.94	5.92e-07
cbdp	1.2	0.05	3.24	0.01	18.1	0.41	2.2e-16	0.5	2.2e-16	***	*

## Sheet: Table 8
	hh	gih	sdah	gisd	cdh	gicd	nodeNh
hh	1	0.42154	0.269696	0.0910723	0.515086	0.0872165	0.0898555
gih	0.42154	1	0.442415	0.53298	0.0383899	0.461351	0.769178
sdah	0.269696	0.442415	1	0.599075	0.29162	0.30509	0.292707
gisd	0.0910723	0.53298	0.599075	1	0.066405	0.43948	0.44931
cdh	0.515086	0.0383899	0.29162	0.066405	1	0.450256	-0.178275
gicd	0.0872165	0.461351	0.30509	0.43948	0.450256	1	0.345678
nodeNh	0.0898555	0.769178	0.292707	0.44931	-0.178275	0.345678	1
giinl	-0.00758392	0.822344	0.297055	0.424116	-0.25312	0.399972	0.674108
dtsm	-0.121429	0.723116	0.274216	0.472932	-0.241374	0.402972	0.787238
dtf	0.00668933	0.706371	0.26919	0.526614	-0.229464	0.333534	0.792275
dtmp	-0.085006	0.615516	0.18045	0.445037	-0.335899	0.21665	0.762239
dtmf	-0.00207973	0.361457	0.120138	0.330607	-0.169925	0.143524	0.484764
fb	0.644414	0.121108	0.300374	0.142702	0.428129	-0.0167389	-0.00220548
yield	0.644142	-0.179289	0.10673	-0.142457	0.560491	-0.132092	-0.370488
THCP	-0.152832	0.198422	0.0786308	0.109302	-0.130989	0.167468	0.136839
CBDP	0.0265141	0.0225866	0.0478641	-0.017066	0.195483	0.0435943	0.00612911
	giinl	dtsm	dtf	dtmp	dtmf	fb	yield
hh	-0.00758392	-0.121429	0.00668933	-0.085006	-0.00207973	0.644414	0.644142
gih	0.822344	0.723116	0.706371	0.615516	0.361457	0.121108	-0.179289
sdah	0.297055	0.274216	0.26919	0.18045	0.120138	0.300374	0.10673
gisd	0.424116	0.472932	0.526614	0.445037	0.330607	0.142702	-0.142457
cdh	-0.25312	-0.241374	-0.229464	-0.335899	-0.169925	0.428129	0.560491
gicd	0.399972	0.402972	0.333534	0.21665	0.143524	-0.0167389	-0.132092
nodeNh	0.674108	0.787238	0.792275	0.762239	0.484764	-0.00220548	-0.370488
giinl	1	0.771561	0.701519	0.657342	0.328539	-0.174095	-0.478601
dtsm	0.771561	1	0.81848	0.807381	0.498812	-0.198282	-0.552365
dtf	0.701519	0.81848	1	0.874096	0.631631	0.0844563	-0.352548
dtmp	0.657342	0.807381	0.874096	1	0.55507	-0.0135597	-0.447527
dtmf	0.328539	0.498812	0.631631	0.55507	1	0.080188	-0.19917
fb	-0.174095	-0.198282	0.0844563	-0.0135597	0.0801879	1	0.81146
yield	-0.478601	-0.552365	-0.352548	-0.447527	-0.19917	0.81146	1
THCP	0.269032	0.302324	0.221374	0.210036	0.0129196	-0.141214	-0.235102
CBDP	0.0427509	-0.0629413	-0.111464	-0.10094	-0.0147551	-0.00371374	0.0545542
	THCP	CBDP
hh	-0.152832	0.0265141
gih	0.198422	0.0225866
sdah	0.0786308	0.0478641
gisd	0.109302	-0.017066
cdh	-0.130989	0.195483
gicd	0.167468	0.0435943
nodeNh	0.136839	0.00612911
giinl	0.269032	0.0427509
dtsm	0.302324	-0.0629413
dtf	0.221374	-0.111464
dtmp	0.210036	-0.10094
dtmf	0.0129196	-0.0147551
fb	-0.141214	-0.00371374
yield	-0.235102	0.0545542
THCP	1	-0.634334
CBDP	-0.634334	1
